# Supplementary material for: A random forest model for predicting the crystallisability of organic molecules
Source: Royal Society of Chemistry journal article supplement (doi:10.1039/c4ce02403f), 2015-01-01
Supplement: c4ce02403f1.pdf [file c4ce02403f1.pdf]

# A Random Forest Model for Predicting the Crystallisability of Organic Molecules

Rajni M. Bhardwaj,<sup>a</sup> Andrea Johnston,<sup>a</sup> Blair F. Johnston,<sup>a</sup> and Alastair J. Florence<sup>a\*</sup>

<sup>a</sup>Strathclyde Institute of Pharmacy and Biomedical Sciences, University of Strathclyde, 161 Cathedral Street, Glasgow G4 0RE, U.K.

\* To whom correspondence should be addressed. E-mail: [alastair.florence@strath.ac.uk](mailto:alastair.florence@strath.ac.uk)

## Table of Contents

|                                               |   |
|-----------------------------------------------|---|
| 1. Schemataic Workflow of Random Forest ..... | 2 |
| 2. Preparation of the Dataset.....            | 3 |
| 3. Error Plot.....                            | 5 |
| 4. Important Descriptors Assessment .....     | 6 |
| 5. References.....                            | 7 |

## 1. Schematic Workflow of Random Forest

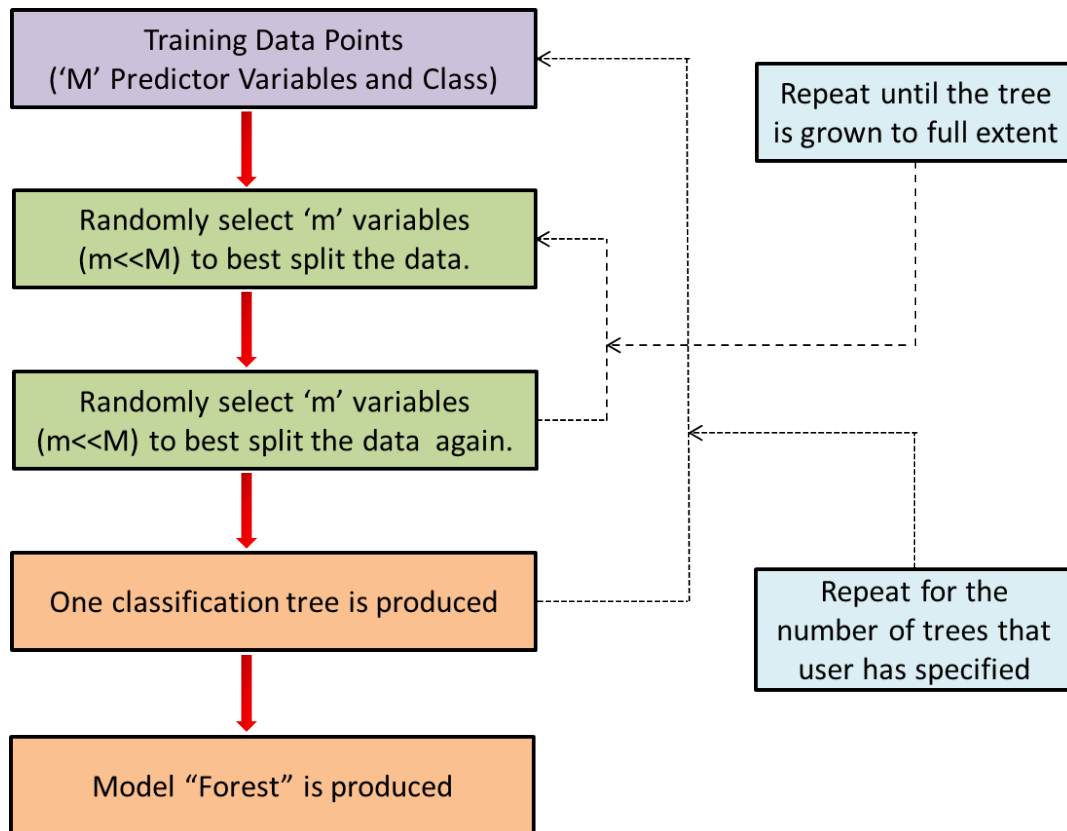

**Random Forest ---- Building the Model Forest**

**Fig. 1** Schematic workflow of building of Random Forests model.

Bootstrap sampling and random selection of input descriptors are used to induce randomness in the input data used to develop the RF model. This ensures that the classification trees grown in the forest are dissimilar and not correlated to each other. Using bootstrap sampling, classification trees are grown using  $2/3^{\text{rd}}$  of the dataset and remaining  $1/3^{\text{rd}}$  of the dataset [Out Of Bag (OOB) data] is employed to obtain unbiased estimates of correct classification rates (internal estimates of error). Compared to a single classification tree, this algorithm yields better prediction rates and is more robust in dealing with noise in the data set because the forest of trees are grown to the full extent. The generalisation error of a forest of trees classifiers depends on the strength of the individual tree in the forest and the correlation between them.

## 2. Preparation of the Dataset

All the molecules were drawn using Chemdraw Ultra (version 11.0) and reliable 3-D conformations generated in Discovery Studio using the Pipeline Pilot interface (Accelrys, 2010). 2-D (185) and internal 3-D (i3-D) (123) molecular descriptors were calculated using MOE.<sup>1</sup> 2-D molecular descriptors are defined to be numerical properties and calculated from the atoms and connection table of the molecule. 3-D molecular descriptors can be classified in two categories: one that depend on internal coordinates only and 2<sup>nd</sup> that depend on absolute orientation of molecule. A brief explanation of the list of calculated 2- and 3-D molecular descriptors which were used to model the solvent library are given in Table 1 (Source: <http://www.chemcomp.com/journal/descr.htm>).

**Table 1** Molecular descriptors and brief explanation that were calculated for solvent molecules.

| Descriptors                                                                                                                                                                                                                                                                                                                                                                                                                                | Category                                       |                                                                                                                                                                                                                                                                                                                                                                               |
|--------------------------------------------------------------------------------------------------------------------------------------------------------------------------------------------------------------------------------------------------------------------------------------------------------------------------------------------------------------------------------------------------------------------------------------------|------------------------------------------------|-------------------------------------------------------------------------------------------------------------------------------------------------------------------------------------------------------------------------------------------------------------------------------------------------------------------------------------------------------------------------------|
| <b>2-D descriptors</b>                                                                                                                                                                                                                                                                                                                                                                                                                     |                                                |                                                                                                                                                                                                                                                                                                                                                                               |
| apol, bpol, Fcharge, mr, SMR, Weight, logP (o/w), SlogP, vdwl_vol, density, vdwl-area                                                                                                                                                                                                                                                                                                                                                      | physical properties                            | Physical properties are calculated from the connection table of a molecule                                                                                                                                                                                                                                                                                                    |
| SlogP_VSA0-SlogP_VSA9, SMR_VSA0 - SMR_VSA7                                                                                                                                                                                                                                                                                                                                                                                                 | subdivided surface areas                       | The Subdivided Surface Areas are descriptors based on an approximate accessible van der Waals surface area calculation for each atom, $v_i$ along with some other atomic property, $p_i$ .                                                                                                                                                                                    |
| a_aro, a_count, a_heavy, a_ICM, a_IC, a_nH, a_nB, a_nC, a_nN, a_nO, a_nF, a_nP, a_nS, a_nCl, a_nBr, a_nI, b_1rotN, b_1rotR, b_ar, b_count, b_double, b_heavy, b_rotN, b_rotR, b_single, b_triple, VAdjMa, VAdjEq                                                                                                                                                                                                                           | atom count and bond count                      | The atom count and bond count descriptors are functions of the counts of atoms and bonds                                                                                                                                                                                                                                                                                      |
| chi0, chi0_C, chi1, chi1_C, chi0v, chi0v_C, chi1v, chi1v_C, Kier1 - Kier3, KierA1 - KierA3, KierFlex, zagreb                                                                                                                                                                                                                                                                                                                               | Kier&Hall Connectivity and Kappa Shape Indices | The Kier and Hall kappa molecular shape indices compare the molecular graph with minimal and maximal molecular graphs, and are intended to capture different aspects of molecular shape.                                                                                                                                                                                      |
| balabanJ, diameter, petitjean, radius, VDistEq, VDistMa, weinerPath, weinerPol                                                                                                                                                                                                                                                                                                                                                             | Adjacency and Distance Matrix Descriptors      | The adjacency matrix, M, of a chemical structure is defined by the elements [Mij] where Mij is 1 if atoms i and j are bonded and zero otherwise. The distance matrix, D, of a chemical structure is defined by the elements [Dij] where Dij is the length of the shortest path from atoms i to j; zero is used if atoms i and j are not part of the same connected component. |
| a_acc, a_acid, a_base, a_don, a_hyd, vsa_acc, vsa_acid, vsa_base, vsa_don, vsa_hyd, vsa_other, vsa_pol                                                                                                                                                                                                                                                                                                                                     | Pharmacophore Feature Descriptors              | The Pharmacophore Atom Type descriptors consider only the heavy atoms of a molecule and assign a type to each atom                                                                                                                                                                                                                                                            |
| Q_PC+ PEOE_PC+, Q_PC- PEOE_PC-, Q_RPC+ PEOE_RPC+, Q_RPC- PEOE_RPC-, Q_VSA_POS PEOE_VSA_POS, Q_VSA_NEG, PEOE_VSA_NEG, Q_VSA_PPOS, PEOE_VSA_PPOS, Q_VSA_PNEG PEOE_VSA_PNEG, Q_VSA_HYD PEOE_VSA_HYD, Q_VSA_POL PEOE_VSA_POL, Q_VSA_FPOS PEOE_VSA_FPOS, Q_VSA_FNEG PEOE_VSA_FNEG, Q_VSA_FPPOS PEOE_VSA_FPPOS, Q_VSA_FPNEG PEOE_VSA_FPNEG, Q_VSA_FHYD PEOE_VSA_FHYD, Q_VSA_FPOL PEOE_VSA_FPOL, PEOE_VSA+6 - PEOE_VSA+0, PEOE_VSA-0 - PEOE_VSA-6 | Partial Charge Descriptors                     | Descriptors that depend on the partial charge of each atom of a chemical structure require calculation of those partial charges.                                                                                                                                                                                                                                              |
| <b>3-D Descriptors</b>                                                                                                                                                                                                                                                                                                                                                                                                                     |                                                |                                                                                                                                                                                                                                                                                                                                                                               |

|                                                                                                                                       |                                            |                                                                                                                           |
|---------------------------------------------------------------------------------------------------------------------------------------|--------------------------------------------|---------------------------------------------------------------------------------------------------------------------------|
| E, E_ang, E_ele, E_nb, E_oop, E_sol, E_stb, E_str, E_strain, E_tor, E_vdw, E_rele, E_rsol, E_rvdw                                     | Potential Energy Descriptors               | The energy descriptors use the MOE potential energy model to calculate energetic quantities from stored 3D conformations. |
| ASA, dens, glob, pmi, pmiX, pmiY, pmiZ, rgyr, std_dim1 –std_dim3, vol, VSA                                                            | Surface Area, Volume and Shape Descriptors | Descriptors depend on the structure connectivity and conformation                                                         |
| ASA+, ASA-, ASA_H, ASA_P, DASA, CASA+, CASA-, DCASA, dipole, diploeX, dipole, dipoleZ, FASA+, FASA-, FCASA+, FCASA-, FCASA_H, FCASA_P | Conformation Dependent Charge Descriptors  | Descriptors depend upon the stored partial charges of the molecules and their conformations.                              |

A correlation matrix was prepared using a Pearson correlation coefficient by using a Pipeline Pilot interface. Molecular descriptors which showed zero variance and covariance (threshold of Pearson correlation coefficient >90%) were removed from the dataset. The resultant dataset comprised of 151 calculated molecular descriptors.

### 3. Error Plot

The error plot in Fig. 2 provides an overall OOB error of prediction and prediction accuracy for the classification model and a confusion matrix in Table 2 provides information on the prediction accuracy and OOB error rate associated with each class.

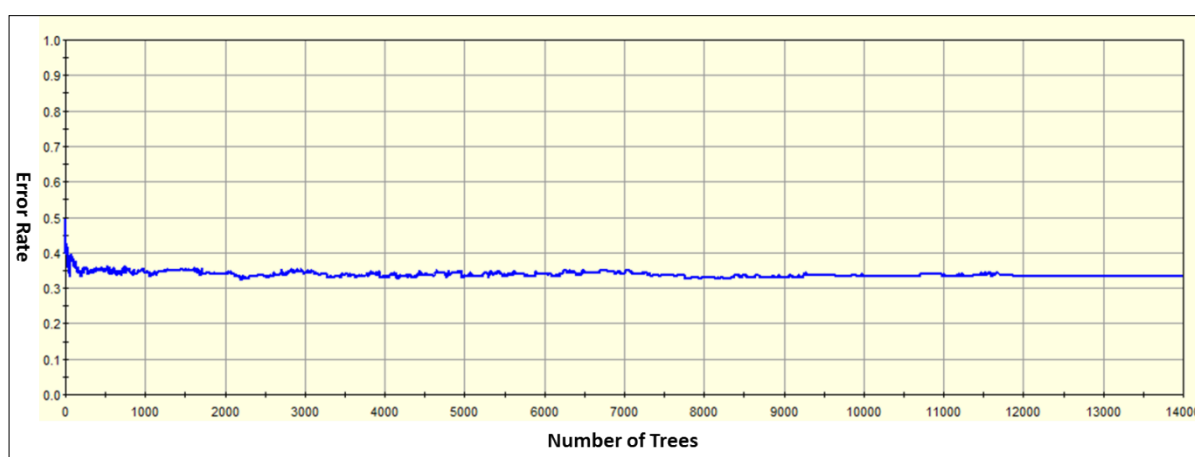

**Fig. 2** Error plot for the Random Forests classification model trained using 2-D and 3-D molecular descriptors of the molecules present in the dataset. Blue line shows the evolution of overall OOB error of prediction with the addition of number of trees.

**Table 2** Confusion matrix generated by Random Forests for classification of dataset of 382 molecules. Class 1 represents the molecules which crystallised and class 2 represents the molecules which did not crystallise.

| <b>Actual Class</b> | <b>Total Cases</b> | <b>% Correct</b> | <b>1, N=231</b> | <b>2, N=151</b> | <b>Class Error</b> |
|---------------------|--------------------|------------------|-----------------|-----------------|--------------------|
| 1                   | 303                | 67.7             | 205             | 98              | 32.34              |
| 2                   | 79                 | 67.1             | 26              | 53              | 32.91              |

#### **4. Important Descriptors Assessment**

The RF algorithm also assesses the importance of descriptors used in building of the classification model. It is assessed by replacing each descriptor in turn by random noise and the resulting deterioration in the model quality is a measure of descriptor importance. The deterioration in the RF model quality is assessed by mean decrease in accuracy (based on OOB data).

**Table 2.** Ten most important descriptors selected by Random Forests for classification model. Reproduced from web reference

<http://www.juit.ac.in/attachments/podophyllotoxin/introduction.htm>

| Descriptor   | Rank | Descriptor Definition                                                  | Further Details of Descriptors                                                                                           |
|--------------|------|------------------------------------------------------------------------|--------------------------------------------------------------------------------------------------------------------------|
| E_TOR        | 1    | Torsion (proper and improper) potential energy                         | The energy descriptors use the MOE potential energy model to calculate energetic quantities from stored 3D conformations |
| E_VDW        | 2    | van der Waals component of the potential energy                        |                                                                                                                          |
| GCUT_SMR_0   | 3    | Atomic contribution to molar refractivity                              | The GCUT descriptors using atomic contribution to molar refractivity instead of partial charge                           |
| AM1_EELE     | 4    | Electronic energy calculated using the AM1 Hamiltonian                 | Can be calculated from the connection table (with no dependence on conformation) of a molecule                           |
| BCUT_PEOE_3  | 5    | Calculated from Adjacency Matrix of a chemical structure               | It is calculated from the eigenvalues of a modified adjacency matrix.                                                    |
| B_1ROTR      | 6    | Fraction of rotatable single bonds: $b\_1rotN$ divided by $b\_count$ . | The atom count and bond count descriptors are functions of the counts of atoms and bonds                                 |
| VSURF_CW2    | 7    | Capacity factor                                                        | Depend on the structure connectivity and conformation                                                                    |
| E            | 8    | Value of the potential energy                                          | Same description as for descriptors ranked from 1-2                                                                      |
| B_ROTTR      | 9    | Fraction of rotatable bonds: $b\_rotN$ divided by $b\_count$ .         | Same description as for descriptors ranked at 6                                                                          |
| GCUT_SLOGP_1 | 10   | Atomic contribution to logP                                            | The GCUT descriptors using atomic contribution to logP instead of partial charge.                                        |

## 5. References

- 1) MOE, 2002, Chemical Computing Group, 1010 Sherbrooke St. W, Montreal, Quebec, H3A 2R7.
